# Supplementary material
Source: publisher figshare collection journal article supplement (https://plos.figshare.com/articles/dataset/_/115957)

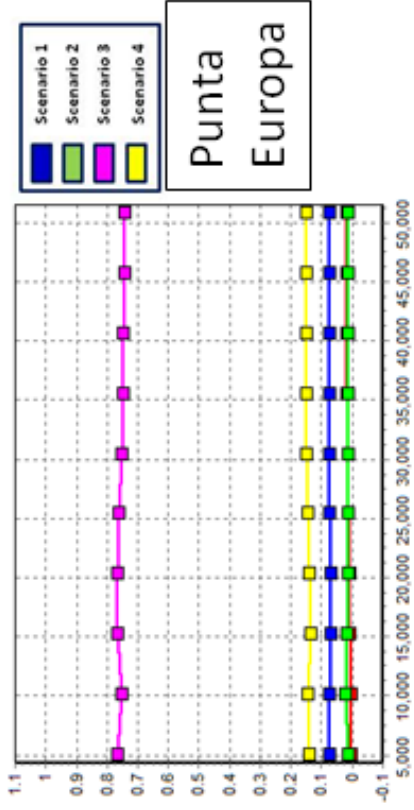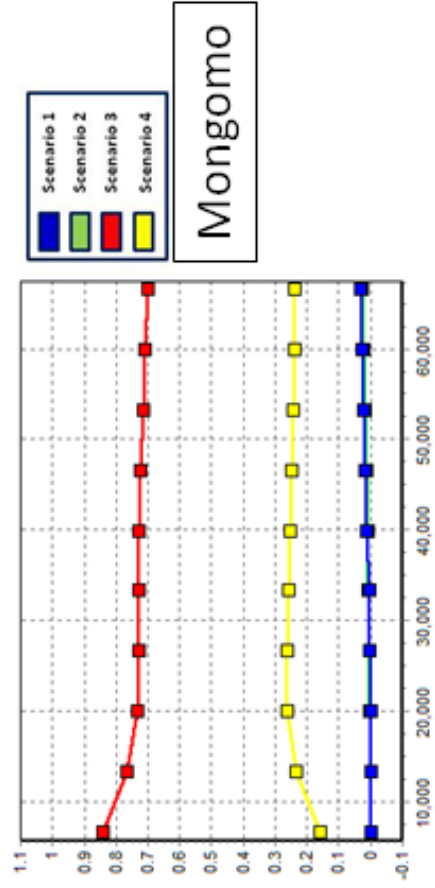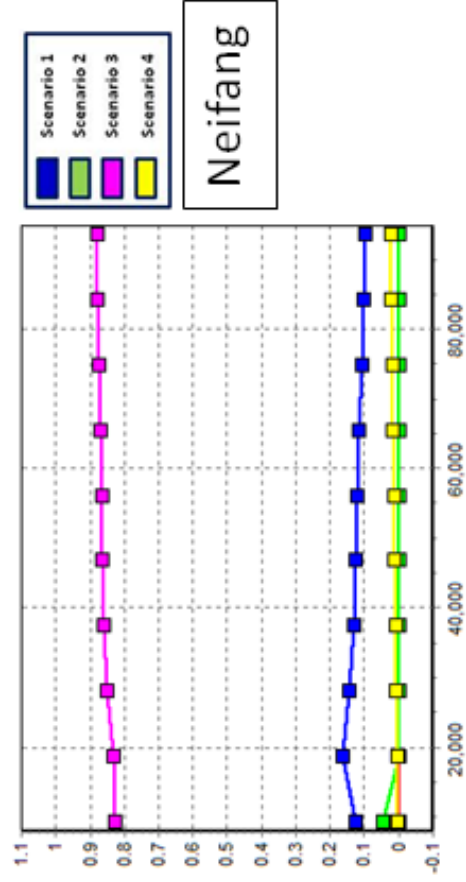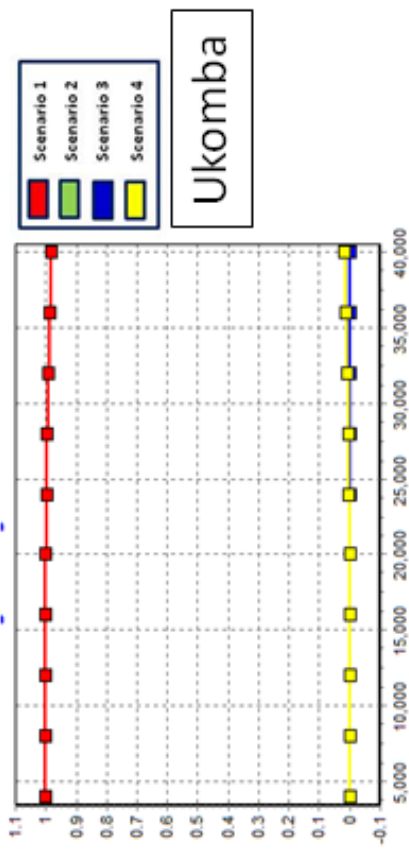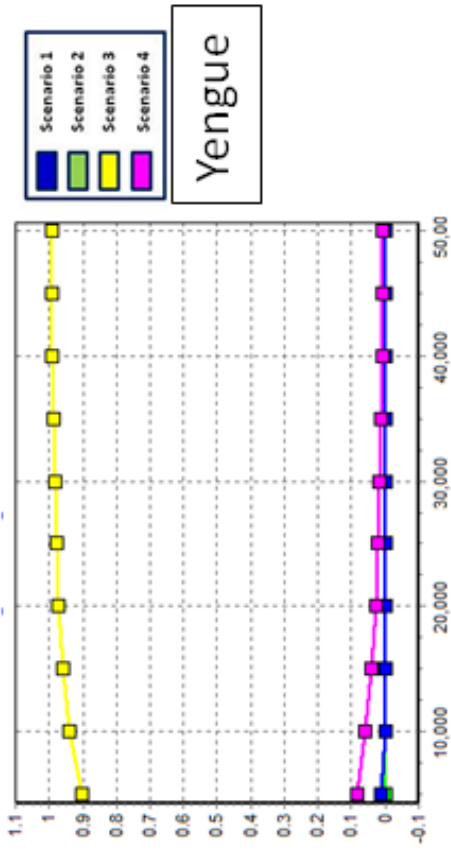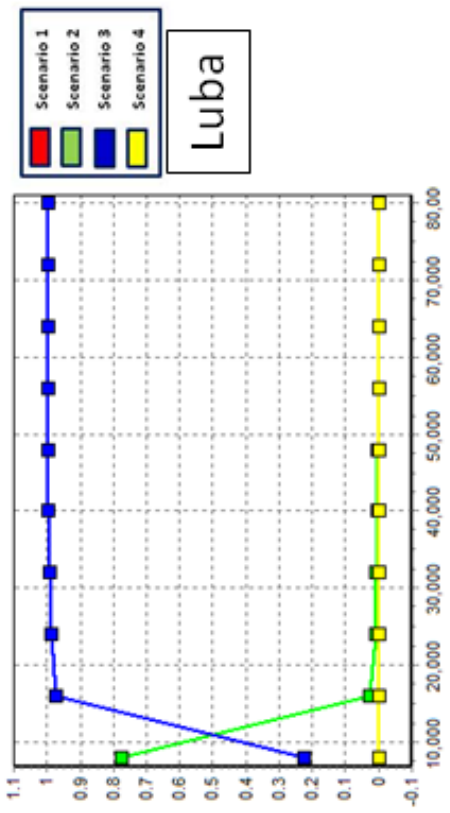

Supplement: Supplementary file [file Figure_S3.pdf › Figure_S3.pdf]
